# Supplementary material for: Application of Positive Matrix Factorization for Source Apportionment of Polycyclic Aromatic Hydrocarbons (PAH) in the Adriatic Sea, and the Evaluation of PAH-Related Carcinogenic Risks
Source: MDPI journal article supplement (doi:10.3390/app13126992), 2023-06-09
Supplement: s1 [file s1]

**Table S1.** Sampling locations and descriptions of the sites in the Coastal zone and along the Mid Adriatic transect selected for the Source apportionment and toxicity assessment.

| Area           | Station | Site description                                                       | Bottom<br>Depth<br>(m) | Latitude<br>N | Longitude<br>E | Date in 2013. |
|----------------|---------|------------------------------------------------------------------------|------------------------|---------------|----------------|---------------|
| COAST          | CS1     | Near Island of Pag- town of Pag/                                       | 49                     | 44,49005      | 15,01010       | March         |
|                | CS2     | Novigrad Sea, near Starigrad                                           | 49                     | 44,28272      | 15,41285       | March         |
|                | CS3     | Town of Zadar, western coast                                           | 33                     | 44,11375      | 15,21542       | March         |
|                | CS4     | Town of Zadar outer port                                               | 34                     | 44,12576      | 15,21077       | February      |
|                | CS5     | Between Zadar and Biograd, near to the new port of Zadar: "Gazenica"   | 61                     | 44,02318      | 15,28622       | March         |
|                | CS6     | Sibenik external near Island of Prvic                                  | 52                     | 43,70396      | 15,80645       | March         |
|                | CS7     | Sibenik external near Island of Zlarin                                 | 25                     | 43,65000      | 15,86183       | March         |
|                | CS8     | Split, West coast, Split touristic harbour                             | 38                     | 43,48643      | 16,44183       | February      |
|                | CS9     | Town of Omis, near former factory for ferrum and chromium production   | 37                     | 43,38127      | 16,90387       | February      |
|                | CS10    | Entrance in the port of Ploce, external station                        | 21                     | 43,02608      | 17,41188       | March         |
|                | CS11    | Dubrovnik external                                                     | 110                    | 42,63339      | 18,02187       | March         |
| TTRANSECT AREA | TS1     | "Split gates" near to Brac Island                                      | 52                     | 43,4267       | 16,3983        | February      |
|                | TS2     | Horizontally aligned with Island of Hvar                               | 78                     | 43,2000       | 16,3167        | February      |
|                | TS3     | Horizontally aligned with Island of Vis                                | 105                    | 43,0000       | 16,3333        | February      |
|                | TS4     | Horizontally aligned to Susac, small island                            | 175                    | 42,6000       | 16,2683        | February      |
|                | TS5     | Horizontally aligned to Palagruza - lighthouse on a small rocky island | 102                    | 42,3666       | 16,2200        | February      |
|                | TS6     | 20 nautic miles distanced from "Monte Garagano"- Italian coast         | 116                    | 42,1333       | 16,1666        | February      |

**Table S2.** Sampling locations and descriptions of the sites in Kaštela and Šibenik Bay selected for the Source apportionment and toxicity assessment

| Area                | Station     | Site description                                 | Bottom<br>Depth<br>(m) | Latitude<br>N | Longitude<br>E | Date in 2013.    |
|---------------------|-------------|--------------------------------------------------|------------------------|---------------|----------------|------------------|
| <b>KASTE LA BAY</b> | <b>KB1</b>  | Central station                                  | 38                     | 43,51833      | 16,38166       | February/October |
|                     | <b>KB2</b>  | Near to the former plant for plastics production | 30                     | 43,53641      | 16,40658       | February         |
|                     | <b>KB3</b>  | Industrial port "Northern port of Split"         | 18                     | 43,53000      | 16,45333       | February/October |
|                     | <b>KB4</b>  | Near to town of Trogir, western part of the Bay  | 22                     | 43,51766      | 16,34633       | February/October |
| <b>ŠIBENIK BAY</b>  | <b>SB1</b>  | Marina-front                                     | 27                     | 43,71939      | 15,89540       | February/October |
|                     | <b>SB2</b>  | Port of Sibenik-front                            | 17                     | 43,72787      | 15,89468       | February/October |
|                     | <b>SB3</b>  | Sibenik center, fisheries port                   | 16                     | 43,73498      | 15,88711       | February/October |
|                     | <b>SB4</b>  | Former ferroalloy factory-front                  | 38                     | 43,74136      | 15,88195       | February/October |
|                     | <b>SB5</b>  | Sibenik bay, middle of the Bay                   | 35                     | 43,73730      | 15,88183       | February         |
|                     | <b>SB1A</b> | Marina-inner                                     | 14                     | 43,72570      | 15,89972       | October          |
|                     | <b>SB2A</b> | Port of Sibenik-inner                            | 17                     | 43,72675      | 15,89471       | October          |
|                     | <b>SB4A</b> | Port of ferroalloy factory-inner                 | 31                     | 43,74350      | 15,88080       | October          |

**Table S3.** List of parent and alkyl-substituted PAH, sulphur heterocyclic aromatic compounds and oxygen heterocyclic aromatic compounds determined in sediment samples; abbreviation, molecular weight and internal standard used as a reference.

|                                      | ABBREVIATION | MW  | INTERNAL STANDARD                     |
|--------------------------------------|--------------|-----|---------------------------------------|
| <b>PAHs and alkylated homologues</b> |              |     |                                       |
| Naphtalene                           | Na           | 128 | Acenaphtene-d <sub>10</sub>           |
| C1-Naphtalenes                       | C1-N         | 142 | Acenaphtene-d <sub>10</sub>           |
| C2-Naphtalenes                       | C2-N         | 156 | Acenaphtene-d <sub>10</sub>           |
| C3-Naphtalenes                       | C3-N         | 170 | Acenaphtene-d <sub>10</sub>           |
| C4-Naphtalenes                       | C4-N         | 184 | Acenaphtene-d <sub>10</sub>           |
| Acenaphtene                          | ACE          | 152 | Acenaphtene-d <sub>10</sub>           |
| Acenaphthylene                       | ACY          | 154 | Acenaphtene-d <sub>10</sub>           |
| Fluorene                             | F            | 166 | Fluorene-d <sub>10</sub>              |
| C1-Fluorenes                         | C1-F         | 180 | Fluorene-d <sub>10</sub>              |
| C2-Fluorenes                         | C2-F         | 194 | Fluorene-d <sub>10</sub>              |
| Anthracene                           | A            | 178 | Fluorene-d <sub>10</sub>              |
| Phenanthrene                         | PHE          | 178 | Fluorene-d <sub>10</sub>              |
| C1- Phenanthrene                     | C1-PHE       | 192 | Fluorene-d <sub>10</sub>              |
| C2- Phenanthrene                     | C2-PHE       | 206 | Fluorene-d <sub>10</sub>              |
| C3- Phenanthrene                     | C3-PHE       | 220 | Fluorene-d <sub>10</sub>              |
| Fluoranthene                         | FL           | 202 | Pyrene-d <sub>10</sub>                |
| Retene                               | R            | 202 | Pyrene-d <sub>10</sub>                |
| Pyrene                               | PY           | 202 | Pyrene-d <sub>10</sub>                |
| C1-Pyrenes                           | C1-PY        | 216 | Pyrene-d <sub>10</sub>                |
| C2-Pyrenes                           | C2-PY        | 230 | Pyrene-d <sub>10</sub>                |
| Benzo[a]anthracene                   | BaA          | 228 | Benzo[a]anthracene-d <sub>12</sub>    |
| Chrysene                             | CHR          | 228 | Benzo[a]anthracene-d <sub>12</sub>    |
| C1-Chrysene                          | C1-CHR       | 242 | Benzo[a]anthracene-d <sub>12</sub>    |
| C2-Chrysene                          | C2-CHR       | 256 | Benzo[a]anthracene-d <sub>12</sub>    |
| C3-Chrysene                          | C3-CHR       | 270 | Benzo[a]anthracene-d <sub>12</sub>    |
| Benzo[a]pyrene                       | BaP          | 252 | Benzo[a]anthracene-d <sub>12</sub>    |
| Benzo[e]pyrene                       | BeP          | 252 | Benzo[a]anthracene-d <sub>12</sub>    |
| Perylene                             | Per          | 252 | Benzo[a]anthracene-d <sub>12</sub>    |
| Dibenzo[a,e]pyrene                   | DBP          | 302 | Benzo[a]anthracene-d <sub>12</sub>    |
| Benzo[b+j]fluoranthene               | BbjFL        | 252 | Benzo[a]anthracene-d <sub>12</sub>    |
| Benzo[k]fluoranthene                 | BkFL         | 252 | Benzo[a]anthracene-d <sub>12</sub>    |
| C1-Benzofluoranthenes                | C1-BFL       | 266 | Benzo[a]anthracene-d <sub>12</sub>    |
| Benzo[ghi]perylene                   | BghiP        | 276 | Indeno[1,2,3-cd]pyren-d <sub>10</sub> |
| Dibenzo[a,h]anthracene               | DBA          | 278 | Indeno[1,2,3-cd]pyren-d <sub>10</sub> |
| Indeno[1,2,3-cd]pyrene               | IP           | 276 | Indeno[1,2,3-cd]pyren-d <sub>10</sub> |
| Coronene                             | COR          | 276 | Indeno[1,2,3-cd]pyren-d <sub>10</sub> |
| PAH compounds with MW of 302         | MW-302       | 302 | Benzo[a]anthracene-d <sub>12</sub>    |
| Dibenzothiophenes                    | DBT          | 184 | Fluorene-d <sub>10</sub>              |
| C1-Dibenzothiophenes                 | C1-DBT       | 198 | Fluorene-d <sub>10</sub>              |
| C2-Dibenzothiophenes,                | C2-DBT       | 212 | Fluorene-d <sub>10</sub>              |
| Benzo[b]naphtothiophenes             | BNT          | 234 | Pyrene-d <sub>10</sub>                |
| C1- Benzo[b]naphtothiophenes         | C1-BNT       | 248 | Pyrene-d <sub>10</sub>                |
| Dibenzo[b,d]furan                    | DBF          | 168 | Fluorene-d <sub>10</sub>              |
| C1 - Dibenzo[b,d]furan               | C1-DBF       | 182 | Fluorene-d <sub>10</sub>              |
| C2 - Dibenzo[b,d]furan               | C2-DBF       | 196 | Fluorene-d <sub>10</sub>              |

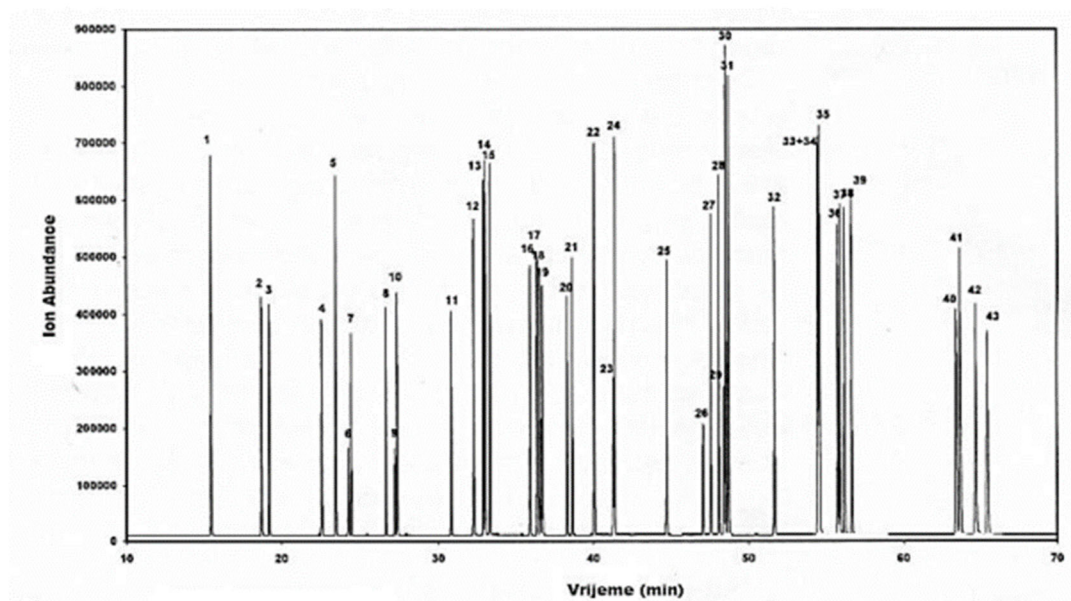

**Figure S1.** Chromatogram of the PAH mixture in sediment sample separated by DB5-MS column and obtained by GC-MS operating in the SIM mode.

**Table S4.** PAH concentration ( $\mu\text{g kg}^{-1}$  dry sediment weight) with limits of detection (LOD) determined in the sediments of Coastal area and measurements uncertainties for each sample used as input data matrices for PMF.

| STATION<br>LOD | CS1<br>2,1E-04 | CS2<br>9,4E-05 | CS3<br>8,5E-04 | CS4<br>4,5E-05 | CS5<br>3,1E-05 | CS6<br>6,6E-05 | CS7<br>1,2E-04 | CS8<br>8,5E-04 | CS9<br>6,5E-04 | CS10<br>3,8E-04 | CS11<br>6,5E-04 |
|----------------|----------------|----------------|----------------|----------------|----------------|----------------|----------------|----------------|----------------|-----------------|-----------------|
| N              | 1.32           | 12.89          | 12.53          | 5.02           | 1.54           | 2.09           | 0.41           | 0.00           | 22.75          | 2.81            | 7.47            |
| C1-N           | 1.38           | 17.14          | 13.67          | 7.12           | 2.05           | 3.34           | 1.19           | 0.00           | 32.77          | 6.42            | 12.54           |
| C2-N           | 3.06           | 30.80          | 17.15          | 13.85          | 1.00           | 4.89           | 2.69           | 3.68           | 54.62          | 11.23           | 20.67           |
| C3-N           | 2.03           | 23.28          | 12.40          | 8.45           | 0.00           | 3.05           | 0.73           | 4.58           | 43.30          | 9.88            | 16.43           |
| C4-N           | 0.34           | 15.84          | 4.93           | 5.10           | 0.00           | 1.27           | 0.78           | 1.18           | 26.97          | 5.19            | 10.00           |
| ACY            | 0.17           | 1.18           | 0.00           | 0.45           | 0.00           | 0.00           | 0.00           | 0.00           | 2.65           | 0.31            | 0.91            |
| ACE            | 0.28           | 1.95           | 7.06           | 1.09           | 1.23           | 1.22           | 0.64           | 0.76           | 7.63           | 0.80            | 2.97            |
| F              | 0.81           | 4.66           | 13.51          | 3.16           | 1.10           | 1.89           | 0.63           | 2.27           | 17.13          | 2.21            | 6.28            |
| C1-F           | 0.74           | 8.39           | 12.51          | 4.90           | 0.00           | 2.93           | 2.33           | 4.29           | 20.85          | 4.48            | 8.60            |
| C2-F           | 0.79           | 13.11          | 5.26           | 3.43           | 0.00           | 1.20           | 2.02           | 5.50           | 16.70          | 3.81            | 6.22            |
| PHE            | 6.78           | 58.25          | 137.66         | 22.80          | 14.52          | 18.34          | 7.11           | 22.83          | 99.72          | 15.79           | 33.25           |
| A              | 1.40           | 11.35          | 38.01          | 7.28           | 2.42           | 4.67           | 1.76           | 4.53           | 35.03          | 2.47            | 11.42           |
| C1-PHE         | 5.66           | 58.95          | 85.76          | 25.37          | 6.62           | 16.42          | 6.81           | 24.49          | 86.70          | 20.36           | 31.86           |
| C2-PHE         | 4.55           | 54.30          | 102.03         | 30.03          | 3.13           | 11.99          | 4.10           | 22.81          | 105.39         | 24.32           | 38.56           |
| C3-PHE         | 3.73           | 57.24          | 85.70          | 19.65          | 0.00           | 5.32           | 1.66           | 13.94          | 71.84          | 16.31           | 21.25           |
| FL             | 8.27           | 42.29          | 239.19         | 49.18          | 18.82          | 33.58          | 12.73          | 23.56          | 186.03         | 23.83           | 69.06           |
| P              | 7.00           | 38.59          | 207.46         | 40.90          | 18.90          | 27.13          | 10.58          | 17.48          | 160.44         | 21.91           | 60.00           |
| R              | 7.12           | 18.24          | 4.26           | 18.38          | 1.32           | 11.03          | 2.64           | 6.05           | 49.25          | 10.01           | 20.61           |
| C1-P           | 6.20           | 44.26          | 186.17         | 49.26          | 14.22          | 29.36          | 8.85           | 21.51          | 203.93         | 20.28           | 74.64           |
| C2-P           | 0.24           | 26.28          | 74.46          | 16.93          | 1.81           | 7.66           | 2.67           | 1.13           | 77.68          | 11.53           | 27.75           |
| BaA            | 2.57           | 20.72          | 120.19         | 27.54          | 11.47          | 14.83          | 7.15           | 11.03          | 94.17          | 8.46            | 34.27           |
| CHR            | 3.06           | 25.35          | 127.35         | 23.36          | 14.61          | 19.76          | 6.31           | 16.43          | 98.89          | 19.80           | 40.67           |
| C1-CHR         | 3.78           | 31.66          | 128.38         | 43.23          | 6.17           | 15.38          | 5.63           | 13.76          | 117.43         | 10.90           | 40.55           |
| C2-CHR         | 1.94           | 21.42          | 71.03          | 14.73          | 0.00           | 5.69           | 2.30           | 8.34           | 55.02          | 6.00            | 16.86           |
| C3-CHR         | 0.00           | 6.81           | 16.00          | 2.46           | 0.00           | 0.29           | 0.81           | 0.34           | 11.96          | 1.88            | 3.65            |
| BbFL           | 25.05          | 38.06          | 287.83         | 55.99          | 16.92          | 28.90          | 15.12          | 55.90          | 175.37         | 27.58           | 61.00           |
| BkFL           | 3.83           | 8.98           | 70.72          | 17.93          | 6.85           | 10.79          | 5.88           | 8.32           | 55.80          | 4.28            | 20.69           |
| C1-BFL         | 4.48           | 18.53          | 82.21          | 23.83          | 10.51          | 17.55          | 10.81          | 12.36          | 92.05          | 5.58            | 35.24           |
| BeP            | 5.17           | 19.00          | 107.68         | 25.92          | 10.24          | 14.39          | 8.14           | 14.01          | 81.12          | 8.41            | 29.83           |
| BaP            | 3.53           | 19.00          | 136.23         | 26.48          | 13.87          | 17.24          | 9.34           | 14.02          | 98.12          | 6.14            | 35.11           |
| PER            | 4.64           | 6.10           | 43.37          | 12.42          | 3.99           | 7.34           | 2.90           | 41.30          | 32.82          | 25.40           | 21.60           |
| IP             | 9.87           | 0.00           | 6.04           | 27.35          | 10.17          | 17.87          | 10.79          | 17.08          | 73.60          | 3.97            | 33.53           |
| DBA            | 1.19           | 2.87           | 6.50           | 11.40          | 2.29           | 4.10           | 1.98           | 3.35           | 24.17          | 0.99            | 9.91            |
| BghiP          | 3.51           | 9.62           | 1.14           | 20.99          | 7.45           | 15.18          | 6.19           | 8.93           | 64.01          | 1.75            | 27.15           |
| NaFL           | 15.49          | 4.39           | 31.37          | 8.20           | 3.78           | 5.00           | 4.20           | 31.15          | 29.81          | 1.01            | 8.10            |
| DBP            | 0.82           | 1.49           | 12.64          | 2.23           | 2.29           | 2.95           | 1.72           | 1.99           | 7.72           | 0.70            | 3.32            |
| COR            | 0.23           | 2.49           | 10.42          | 1.95           | 2.56           | 3.62           | 1.02           | 0.44           | 6.96           | 0.38            | 2.95            |
| Mw-302         | 19.14          | 14.08          | 71.34          | 23.63          | 13.63          | 23.46          | 13.90          | 38.42          | 92.10          | 2.55            | 34.00           |
| DBT            | 0.85           | 22.40          | 15.96          | 7.36           | 1.40           | 3.38           | 1.20           | 3.01           | 26.23          | 2.74            | 7.69            |
| C1-DBT         | 0.00           | 37.87          | 18.96          | 11.00          | 0.55           | 4.35           | 1.56           | 0.00           | 42.91          | 3.63            | 12.12           |
| C2-DBT         | 0.81           | 63.38          | 19.82          | 12.00          | 0.00           | 4.58           | 1.70           | 4.03           | 42.69          | 7.30            | 9.89            |
| C3-DBT         | 0.70           | 49.92          | 14.89          | 8.11           | 0.00           | 1.93           | 0.84           | 2.57           | 23.74          | 4.03            | 3.12            |
| BNT            | 2.18           | 15.93          | 11.55          | 10.02          | 5.31           | 10.39          | 3.23           | 70.40          | 38.73          | 3.57            | 15.59           |
| C1-BNT         | 2.95           | 37.17          | 26.87          | 12.91          | 0.63           | 7.50           | 3.08           | 15.93          | 43.90          | 4.87            | 12.87           |
| DBF            | 1.88           | 12.27          | 9.91           | 4.81           | 1.27           | 1.99           | 1.44           | 2.85           | 18.59          | 3.67            | 6.68            |
| C1-DBF         | 1.01           | 7.84           | 8.03           | 3.51           | 0.95           | 0.98           | 0.35           | 3.11           | 16.19          | 2.44            | 5.66            |
| C2-DBF         | 0.15           | 3.09           | 1.91           | 1.66           | 0.00           | 0.82           | 0.25           | 0.60           | 7.69           | 1.71            | 3.17            |
| M.U.           | 0.14           | 0.16           | 0.13           | 0.23           | 0.19           | 0.17           | 0.21           | 0.18           | 0.25           | 0.22            | 0.10            |

**Table S5.** PAH concentration ( $\mu\text{g kg}^{-1}$  dry sediment weight) with limits of detection (LOD) determined in the sediments of transect area and measurements uncertainties (M.U.) for each sample used as input data matrices for PMF.

| <b>Station</b> | <b>TS1</b>     | <b>TS2</b>     | <b>TS3</b>     | <b>TS4</b>     | <b>TS5</b>     | <b>TS6</b>     |
|----------------|----------------|----------------|----------------|----------------|----------------|----------------|
| <b>LOD</b>     | <b>2.1E-05</b> | <b>9.0E-05</b> | <b>8.5E-04</b> | <b>3.4E-05</b> | <b>2.0E-05</b> | <b>4.1E-04</b> |
| N              | 1.194          | 0.220          | 0.209          | 17.777         | 2.635          | 10.173         |
| C1-N           | 1.252          | 0.752          | 0.807          | 0.638          | 5.292          | 21.383         |
| C2-N           | 2.858          | 1.125          | 2.145          | 1.983          | 7.577          | 33.283         |
| C3-N           | 1.943          | 1.002          | 1.583          | 0.346          | 5.362          | 20.959         |
| C4-N           | 0.568          | 0.635          | 0.970          | 0.000          | 3.260          | 14.020         |
| ACY            | 0.191          | 0.000          | 0.059          | 0.000          | 0.154          | 0.648          |
| ACE            | 0.255          | 0.081          | 0.052          | 0.000          | 0.195          | 0.635          |
| F              | 0.778          | 0.180          | 0.225          | 0.492          | 0.726          | 3.351          |
| C1-F           | 0.986          | 0.888          | 0.684          | 0.313          | 2.607          | 10.550         |
| C2-F           | 0.492          | 3.004          | 0.743          | 0.000          | 2.386          | 9.314          |
| PHE            | 9.445          | 1.615          | 2.233          | 4.345          | 7.710          | 25.357         |
| A              | 2.670          | 0.239          | 0.173          | 0.521          | 0.670          | 2.209          |
| C1-PHE         | 7.349          | 1.491          | 3.255          | 4.874          | 13.404         | 41.951         |
| C2-PHE         | 4.930          | 0.850          | 1.941          | 1.263          | 9.764          | 39.964         |
| C3-PHE         | 1.830          | 1.628          | 1.160          | 0.314          | 5.958          | 23.440         |
| FL             | 14.479         | 2.210          | 1.755          | 1.924          | 4.774          | 13.750         |
| P              | 11.863         | 1.648          | 1.471          | 1.499          | 4.534          | 15.747         |
| R              | 2.182          | 0.429          | 0.447          | 0.293          | 1.656          | 16.776         |
| C1-P           | 10.928         | 1.639          | 2.284          | 0.334          | 9.211          | 41.576         |
| C2-P           | 2.950          | 1.499          | 1.248          | 0.000          | 5.663          | 27.639         |
| BaA            | 10.668         | 0.881          | 0.861          | 0.465          | 3.209          | 8.994          |
| CHR            | 9.086          | 0.985          | 1.455          | 0.902          | 5.233          | 14.164         |
| C1-CHR         | 5.451          | 1.126          | 1.595          | 0.313          | 6.252          | 32.927         |
| C2-CHR         | 2.762          | 1.004          | 1.174          | 0.000          | 5.006          | 32.119         |
| C3-CHR         | 0.000          | 0.006          | 0.513          | 0.000          | 1.255          | 9.472          |
| BbFL           | 18.837         | 2.276          | 4.159          | 0.902          | 11.230         | 57.603         |
| BkFL           | 6.693          | 0.785          | 1.252          | 0.000          | 3.222          | 17.068         |
| C1-BFL         | 7.011          | 1.343          | 4.354          | 0.278          | 11.138         | 73.344         |
| BeP            | 8.674          | 1.220          | 1.917          | 1.173          | 5.497          | 31.007         |
| BaP            | 10.762         | 1.137          | 1.066          | 0.453          | 2.843          | 14.804         |
| PER            | 3.966          | 0.562          | 1.043          | 0.553          | 3.096          | 70.100         |
| IP             | 10.807         | 1.964          | 3.565          | 2.662          | 8.584          | 41.591         |
| DBA            | 2.136          | 0.293          | 0.548          | 0.345          | 1.573          | 6.756          |
| BghiP          | 8.276          | 1.128          | 1.848          | 1.045          | 5.833          | 29.891         |
| NaFL           | 3.015          | 0.000          | 0.000          | 5.527          | 5.003          | 17.892         |
| DBP            | 1.033          | 0.240          | 0.384          | 0.000          | 0.995          | 4.347          |
| COR            | 1.543          | 0.527          | 1.824          | 0.000          | 5.297          | 17.904         |
| Mw-302         | 9.164          | 1.777          | 3.878          | 6.450          | 15.769         | 58.842         |
| DBT            | 1.494          | 0.218          | 0.227          | 0.455          | 0.710          | 2.535          |
| C1-DBT         | 0.676          | 0.440          | 0.536          | 0.000          | 1.013          | 4.478          |
| C2-DBT         | 0.800          | 0.906          | 1.088          | 0.000          | 1.633          | 8.149          |
| C3-DBT         | 0.288          | 0.906          | 0.570          | 0.000          | 1.125          | 5.134          |
| BNT            | 1.764          | 0.563          | 0.689          | 0.384          | 2.225          | 7.455          |
| C1-BNT         | 2.255          | 0.505          | 1.097          | 0.730          | 2.380          | 13.834         |
| DBF            | 1.569          | 0.552          | 0.680          | 0.000          | 1.537          | 6.746          |
| C1-DBF         | 0.717          | 0.305          | 0.218          | 2.155          | 0.823          | 2.983          |
| C2-DBF         | 0.202          | 0.074          | 0.050          | 1.238          | 0.315          | 0.654          |
| <b>M.U.</b>    | <b>0.10</b>    | <b>0.05</b>    | <b>0.15</b>    | <b>0.07</b>    | <b>0.090</b>   | <b>0.06</b>    |

**Table S6.** PAH concentration ( $\mu\text{g kg}^{-1}$  dry sediment weight) with limits of detection (LOD) determined in the sediments of Kastela Bay are and measurements uncertainties (M.U.) for each sample used as input data matrices for PMF.

| Station | KB1     | KB2     | KB3     | KB4     | KB1     | KB3     | KB4     |
|---------|---------|---------|---------|---------|---------|---------|---------|
| LOD     | 2.1E-05 | 9.0E-05 | 8.5E-04 | 3.4E-05 | 2.0E-05 | 4.1E-04 | 6.3E-05 |
| N       | 3.560   | 10.374  | 16.980  | 2.305   | 8.733   | 21.551  | 2.288   |
| C1-N    | 6.233   | 16.442  | 52.037  | 5.422   | 12.806  | 58.808  | 4.032   |
| C2-N    | 14.691  | 40.184  | 116.753 | 13.283  | 11.391  | 72.485  | 9.028   |
| C3-N    | 13.083  | 28.915  | 103.110 | 9.858   | 7.462   | 60.312  | 5.914   |
| C4-N    | 8.192   | 15.933  | 51.334  | 5.499   | 3.908   | 39.403  | 2.514   |
| ACY     | 0.543   | 1.081   | 2.308   | 0.364   | 1.110   | 2.409   | 0.295   |
| ACE     | 1.139   | 2.445   | 9.677   | 0.608   | 2.077   | 9.313   | 0.462   |
| F       | 3.221   | 6.014   | 20.497  | 2.181   | 5.204   | 20.004  | 1.537   |
| C1-F    | 7.782   | 14.296  | 55.555  | 5.541   | 3.978   | 35.998  | 2.227   |
| C2-F    | 9.389   | 18.715  | 65.352  | 8.381   | 3.787   | 30.419  | 4.732   |
| PHE     | 22.752  | 37.154  | 90.443  | 11.227  | 41.907  | 90.631  | 10.461  |
| A       | 7.161   | 8.437   | 26.896  | 3.570   | 15.569  | 27.471  | 2.969   |
| C1-PHE  | 28.570  | 44.727  | 126.511 | 14.961  | 37.921  | 132.304 | 8.981   |
| C2-PHE  | 31.699  | 51.169  | 157.622 | 13.818  | 44.854  | 152.854 | 10.160  |
| C3-PHE  | 22.407  | 34.838  | 105.337 | 9.558   | 29.764  | 97.402  | 7.026   |
| FL      | 37.230  | 59.538  | 127.579 | 17.397  | 64.771  | 134.127 | 18.062  |
| P       | 32.573  | 54.949  | 120.442 | 13.778  | 56.199  | 126.627 | 15.052  |
| R       | 11.315  | 12.186  | 41.777  | 3.778   | 16.377  | 40.064  | 3.514   |
| C1-P    | 50.848  | 97.989  | 249.731 | 26.167  | 63.823  | 190.311 | 18.034  |
| C2-P    | 17.511  | 27.705  | 121.780 | 7.842   | 22.306  | 106.779 | 5.662   |
| BaA     | 14.973  | 25.688  | 47.389  | 9.370   | 35.785  | 66.792  | 8.385   |
| CHR     | 14.281  | 33.502  | 70.075  | 15.726  | 38.489  | 176.841 | 9.416   |
| C1-CHR  | 20.530  | 32.923  | 89.539  | 9.961   | 40.868  | 115.163 | 7.231   |
| C2-CHR  | 12.990  | 22.849  | 92.546  | 7.863   | 20.989  | 66.996  | 4.896   |
| C3-CHR  | 49.426  | 72.486  | 132.479 | 27.755  | 101.340 | 200.154 | 31.208  |
| BbFL    | 2.817   | 4.286   | 10.321  | 1.187   | 5.483   | 14.876  | 0.950   |
| BkFL    | 0.823   | 2.903   | 1.407   | 1.024   | 3.166   | 10.245  | 0.734   |
| C1-BFL  | 17.907  | 28.206  | 51.848  | 9.379   | 33.641  | 77.003  | 7.240   |
| BeP     | 14.413  | 26.900  | 45.574  | 7.976   | 36.227  | 89.254  | 8.425   |
| BaP     | 8.579   | 10.880  | 23.029  | 4.229   | 17.390  | 32.235  | 2.960   |
| PER     | 3.057   | 5.269   | 8.743   | 1.904   | 7.482   | 17.517  | 1.651   |
| IP      | 9.472   | 22.111  | 21.826  | 6.248   | 30.105  | 60.117  | 5.237   |
| DBA     | 3.194   | 7.456   | 7.351   | 2.926   | 12.385  | 23.512  | 3.186   |
| BghiP   | 1.371   | 3.315   | 2.263   | 1.153   | 3.483   | 8.406   | 1.007   |
| NaFL    | 1.560   | 5.358   | 2.251   | 1.808   | 3.842   | 9.185   | 1.395   |
| DBP     | 10.635  | 29.705  | 22.833  | 9.984   | 35.793  | 58.178  | 9.409   |
| COR     | 6.298   | 12.438  | 28.091  | 6.119   | 10.821  | 32.959  | 3.719   |
| Mw-302  | 9.946   | 19.953  | 63.100  | 9.655   | 16.106  | 42.972  | 5.875   |
| DBT     | 16.637  | 41.802  | 92.128  | 17.011  | 19.869  | 101.539 | 6.441   |
| C1-DBT  | 12.220  | 23.184  | 56.309  | 7.158   | 12.196  | 44.253  | 4.780   |
| C2-DBT  | 8.949   | 17.900  | 31.763  | 7.842   | 16.387  | 24.651  | 5.041   |
| C3-DBT  | 11.125  | 29.443  | 73.291  | 12.043  | 21.481  | 62.397  | 7.357   |
| BNT     | 4.565   | 8.370   | 19.858  | 3.004   | 7.849   | 19.639  | 2.744   |
| C1-BNT  | 3.491   | 10.667  | 13.906  | 4.167   | 5.493   | 21.708  | 1.526   |
| DBF     | 1.733   | 3.065   | 10.582  | 0.993   | 2.815   | 4.317   | 0.845   |
| C1-DBF  | 3.958   | 10.228  | 31.870  | 3.339   | 7.946   | 37.549  | 2.351   |
| C2-DBF  | 2.274   | 6.214   | 20.167  | 2.083   | 4.859   | 21.259  | 1.681   |
| M.U.    | 0.20    | 0.18    | 0.28    | 0.24    | 0.13    | 0.17    | 0.15    |

**Table S7.** PAH concentration ( $\mu\text{g kg}^{-1}$  dry sediment weight) with limits of detection (LOD) determined in the sediments of Šibenik bay and measurements uncertainties (M.U.) for each sample used as input data matrices for PMF.

| STATION | SB1     | SB2     | SB3     | SB4     | SB5     | SB1    | SB2    | SB3     | SB4     | SB1A    | SB2A    | SB4A    |
|---------|---------|---------|---------|---------|---------|--------|--------|---------|---------|---------|---------|---------|
| LOD     | 0.00048 | 3.7E-04 | 8.7E-04 | 6.5E-04 | 9.8E-05 | 0.0007 | 0.0004 | 1.8E-04 | 2.2E-04 | 1.2E-05 | 5.8E-04 | 6.7E-04 |
| N       | 350.81  | 27.42   | 40.16   | 85.34   | 13.81   | 59.13  | 24.56  | 68.30   | 71.67   | 123.09  | 41.42   | 117.34  |
| C1-N    | 626.31  | 30.77   | 37.41   | 60.40   | 14.17   | 41.46  | 43.02  | 63.17   | 91.38   | 159.47  | 47.58   | 197.44  |
| C2-N    | 307.77  | 33.47   | 34.79   | 53.73   | 28.52   | 57.49  | 81.97  | 86.96   | 160.28  | 145.17  | 70.16   | 189.07  |
| C3-N    | 230.73  | 19.81   | 23.50   | 53.34   | 74.82   | 70.52  | 60.28  | 47.78   | 125.80  | 112.03  | 41.49   | 139.96  |
| C4-N    | 139.49  | 0.00    | 11.76   | 18.16   | 0.00    | 9.23   | 21.99  | 8.53    | 53.54   | 68.83   | 8.63    | 87.05   |
| ACY     | 70.04   | 0.00    | 2.48    | 7.98    | 0.00    | 9.66   | 3.41   | 2.57    | 9.39    | 10.82   | 1.69    | 8.15    |
| ACE     | 673.40  | 48.68   | 44.60   | 134.60  | 30.45   | 55.51  | 51.83  | 121.92  | 89.73   | 108.53  | 78.85   | 176.64  |
| F       | 76.81   | 54.39   | 56.14   | 152.92  | 36.84   | 71.75  | 55.18  | 146.25  | 103.45  | 127.72  | 78.97   | 183.64  |
| C1-F    | 394.01  | 24.52   | 27.89   | 62.73   | 28.67   | 61.58  | 60.51  | 536.47  | 91.80   | 105.19  | 30.38   | 129.28  |
| C2-F    | 175.17  | 6.84    | 15.16   | 36.91   | 7.06    | 26.36  | 57.40  | 60.00   | 105.11  | 129.91  | 18.99   | 156.32  |
| PHE     | 359.24  | 487.99  | 662.38  | 1312.98 | 365.38  | 682.77 | 498.22 | 50.00   | 999.86  | 1119.77 | 539.81  | 1447.85 |
| A       | 84.65   | 159.34  | 145.59  | 306.80  | 86.73   | 143.30 | 100.36 | 315.85  | 220.92  | 265.64  | 105.25  | 330.97  |
| C1-PHE  | 440.80  | 148.06  | 220.09  | 490.20  | 118.93  | 296.74 | 263.22 | 804.11  | 591.39  | 494.27  | 324.22  | 494.39  |
| C2-PHE  | 635.77  | 117.87  | 157.70  | 318.95  | 89.37   | 251.15 | 224.58 | 479.66  | 527.03  | 450.39  | 220.98  | 434.79  |
| C3-PHE  | 307.91  | 43.17   | 91.99   | 219.66  | 39.60   | 161.85 | 162.44 | 224.97  | 306.62  | 330.07  | 98.15   | 298.67  |
| FL      | 694.47  | 894.10  | 1040.16 | 2375.64 | 819.05  | 956.94 | 961.95 | 1925.84 | 1977.56 | 2321.01 | 784.63  | 2830.75 |
| P       | 593.52  | 748.63  | 840.86  | 1958.56 | 664.67  | 876.97 | 820.92 | 1587.80 | 1719.64 | 1968.87 | 690.30  | 2297.86 |
| R       | 126.42  | 97.44   | 52.74   | 16.29   | 136.21  | 68.85  | 307.57 | 88.28   | 170.73  | 12.52   | 28.69   | 326.65  |
| C1-P    | 515.33  | 469.13  | 450.76  | 1190.12 | 360.46  | 677.83 | 745.39 | 1295.35 | 1251.09 | 1037.12 | 725.26  | 1701.86 |
| C2-P    | 391.27  | 155.25  | 197.72  | 497.68  | 104.36  | 300.43 | 257.02 | 437.41  | 443.99  | 625.65  | 283.55  | 470.59  |
| BaA     | 388.62  | 489.00  | 460.13  | 1142.13 | 419.78  | 515.66 | 484.11 | 789.30  | 941.67  | 1142.78 | 418.99  | 1370.17 |
| CHR     | 412.53  | 525.68  | 489.73  | 1242.15 | 466.04  | 584.13 | 535.72 | 823.35  | 1071.84 | 1270.85 | 557.79  | 1482.98 |
| C1-CHR  | 586.57  | 425.68  | 349.55  | 1060.75 | 289.18  | 323.27 | 328.94 | 516.48  | 604.90  | 891.37  | 418.79  | 978.85  |
| C2-CHR  | 212.11  | 116.19  | 132.78  | 334.49  | 79.76   | 208.84 | 154.53 | 221.18  | 329.65  | 547.55  | 196.10  | 478.93  |
| C3-CHR  | 99.27   | 4.61    | 16.36   | 51.96   | 0.00    | 40.65  | 11.90  | 31.93   | 57.67   | 71.54   | 25.23   | 60.64   |
| BbFL    | 913.27  | 1121.35 | 972.73  | 2741.60 | 964.21  | 930.90 | 726.11 | 1024.80 | 1648.42 | 2715.55 | 645.96  | 2892.63 |
| BkFL    | 243.59  | 289.13  | 238.84  | 650.38  | 252.53  | 297.38 | 234.20 | 334.85  | 533.63  | 645.96  | 198.30  | 685.53  |
| C1-BFL  | 260.56  | 317.27  | 241.96  | 884.32  | 202.30  | 552.53 | 450.07 | 680.51  | 779.19  | 805.28  | 565.46  | 850.89  |
| BeP     | 338.54  | 414.89  | 363.65  | 982.61  | 349.81  | 442.19 | 353.50 | 506.14  | 806.10  | 981.28  | 359.85  | 1036.15 |
| BaP     | 453.93  | 558.49  | 517.07  | 1406.44 | 494.37  | 618.70 | 519.11 | 772.87  | 1159.38 | 1394.69 | 461.83  | 1576.52 |
| PER     | 177.34  | 208.14  | 157.42  | 403.26  | 175.02  | 162.69 | 144.58 | 186.86  | 289.41  | 384.41  | 115.08  | 458.79  |
| IP      | 104.09  | 24.92   | 21.74   | 65.85   | 374.41  | 515.86 | 372.74 | 538.06  | 896.61  | 108.19  | 322.72  | 119.22  |
| DBA     | 111.15  | 26.26   | 27.77   | 320.75  | 24.13   | 122.05 | 96.60  | 143.76  | 226.43  | 123.70  | 89.90   | 146.03  |
| BghiP   | 9.88    | 5.41    | 4.68    | 12.69   | 5.77    | 452.00 | 345.67 | 455.36  | 816.03  | 13.63   | 326.19  | 15.77   |
| NaFL    | 138.44  | 168.70  | 155.36  | 621.81  | 145.57  | 200.32 | 164.96 | 212.64  | 381.08  | 654.30  | 134.16  | 640.50  |
| DBP     | 79.28   | 80.14   | 105.54  | 321.80  | 73.19   | 93.55  | 83.99  | 88.49   | 166.88  | 334.90  | 72.73   | 342.59  |
| COR     | 75.39   | 84.12   | 83.44   | 281.06  | 71.53   | 99.68  | 86.91  | 85.53   | 190.35  | 345.19  | 61.04   | 275.24  |
| Mw-302  | 482.68  | 411.61  | 443.20  | 1508.08 | 495.78  | 830.14 | 802.54 | 867.37  | 1564.46 | 1946.85 | 587.73  | 1806.81 |
| DBT     | 72.95   | 46.59   | 56.98   | 122.74  | 41.39   | 61.03  | 59.91  | 128.33  | 100.21  | 152.53  | 47.60   | 228.96  |
| C1-DBT  | 164.06  | 39.69   | 31.36   | 62.25   | 20.01   | 28.70  | 67.59  | 50.79   | 109.27  | 111.93  | 32.02   | 241.44  |
| C2-DBT  | 156.44  | 28.92   | 20.02   | 53.00   | 11.23   | 30.80  | 79.60  | 37.44   | 121.81  | 134.52  | 35.99   | 147.33  |
| C3-DBT  | 107.66  | 11.35   | 10.76   | 44.77   | 8.63    | 27.33  | 31.51  | 11.20   | 71.17   | 102.18  | 28.95   | 104.06  |
| BNT     | 168.72  | 205.64  | 44.73   | 101.47  | 180.48  | 254.59 | 250.29 | 385.63  | 393.51  | 113.27  | 260.93  | 141.01  |
| C1-BNT  | 65.91   | 94.34   | 57.91   | 203.57  | 79.42   | 140.74 | 189.62 | 182.48  | 271.27  | 283.88  | 285.91  | 346.48  |
| DBF     | 58.60   | 29.06   | 40.50   | 80.27   | 16.83   | 60.92  | 32.47  | 104.77  | 72.35   | 98.63   | 52.08   | 118.91  |
| C1-DBF  | 50.90   | 22.62   | 25.32   | 41.37   | 11.15   | 24.21  | 43.00  | 56.53   | 52.06   | 66.17   | 18.11   | 85.17   |
| C2-DBF  | 47.74   | 2.93    | 3.37    | 6.03    | 9.20    | 11.28  | 12.74  | 26.81   | 27.68   | 10.12   | 7.96    | 11.38   |
| M.U.    | 0.17    | 0.17    | 0.15    | 0.01    | 0.11    | 0.10   | 0.05   | 0.01    | 0.07    | 0.2     | 0.15    | 0.25    |
